# Supplementary material
Source: PubMed Central journal article supplement (PMC8779329)
Supplement: NIHMS1760104-supplement-Supplementary_Figures_and_Tables.pdf [file NIHMS1760104-supplement-Supplementary_Figures_and_Tables.pdf]

**Table S1. List of drugs taken by ICB-treated melanoma patients, related to Figure 1.**

| <b>Drug name</b>                    | <b>Alive NO.</b> | <b>Deceased NO.</b> | <b>Deceased %</b> | <b>Fisher exact test</b> |
|-------------------------------------|------------------|---------------------|-------------------|--------------------------|
| Acetaminophen (Tylenol)             | 81               | 75                  | 0.48              | 0.03                     |
| Antiarthritics                      | 225              | 138                 | 0.38              | 0.90                     |
| Antiasthmatics                      | 79               | 61                  | 0.44              | 0.26                     |
| Antibiotics                         | 185              | 143                 | 0.44              | 0.13                     |
| Anticoagulants                      | 63               | 77                  | 0.55              | 0.00                     |
| Antiemetic -phenothiazines          | 90               | 111                 | 0.55              | 0.00                     |
| Antihistamines-1st                  | 163              | 116                 | 0.42              | 0.40                     |
| Antihistamines-2nd                  | 95               | 38                  | 0.29              | 0.03                     |
| Antiplatelet drugs                  | 130              | 65                  | 0.33              | 0.19                     |
| Aspirin                             | 166              | 65                  | 0.28              | 0.00                     |
| Atorvastatin                        | 70               | 53                  | 0.43              | 0.38                     |
| Azithromycin                        | 22               | 10                  | 0.31              | 0.46                     |
| Cephalosporin (1st-4th generations) | 35               | 23                  | 0.40              | 0.89                     |
| Codeine                             | 41               | 18                  | 0.31              | 0.27                     |
| Dabrafenib mesylate                 | 41               | 44                  | 0.52              | 0.02                     |
| Diphenhydramine HCL                 | 88               | 72                  | 0.45              | 0.14                     |
| Docusate sodium                     | 57               | 45                  | 0.44              | 0.29                     |
| Esomeprazole (Meganesium)           | 27               | 15                  | 0.36              | 0.75                     |
| Fluoroquinolones                    | 46               | 36                  | 0.44              | 0.35                     |
| Glucocorticoid                      | 131              | 107                 | 0.45              | 0.09                     |
| Hydrochlorothiazide                 | 36               | 17                  | 0.32              | 0.38                     |
| Hydrocortisone                      | 57               | 39                  | 0.41              | 0.74                     |
| Lbuprofen                           | 108              | 60                  | 0.36              | 0.49                     |
| Levothyroxine                       | 177              | 113                 | 0.39              | 0.94                     |
| Loratadine                          | 117              | 87                  | 0.43              | 0.30                     |
| Metformin                           | 70               | 51                  | 0.42              | 0.49                     |
| Metoprolol tartrate                 | 40               | 31                  | 0.44              | 0.45                     |
| Morphine (morphine sulfate)         | 17               | 52                  | 0.75              | 0.00                     |
| Omeprazole                          | 45               | 49                  | 0.52              | 0.01                     |
| Ondansetron                         | 140              | 166                 | 0.54              | 0.00                     |
| Oxycodone                           | 56               | 68                  | 0.55              | 0.00                     |
| Penicillin                          | 43               | 34                  | 0.44              | 0.39                     |
| Prednisone                          | 60               | 50                  | 0.45              | 0.18                     |
| Ranitidine hydrochloride            | 23               | 12                  | 0.34              | 0.72                     |
| Salicylate analgesics               | 133              | 65                  | 0.33              | 0.14                     |
| Simvastatin                         | 43               | 30                  | 0.41              | 0.71                     |
| Tetracycline antibiotics            | 34               | 26                  | 0.43              | 0.50                     |
| Tramadol                            | 158              | 135                 | 0.46              | 0.03                     |
| Trametinib                          | 29               | 45                  | 0.61              | 0.00                     |
| Valsartan                           | 21               | 6                   | 0.22              | 0.11                     |

**Figure S1**

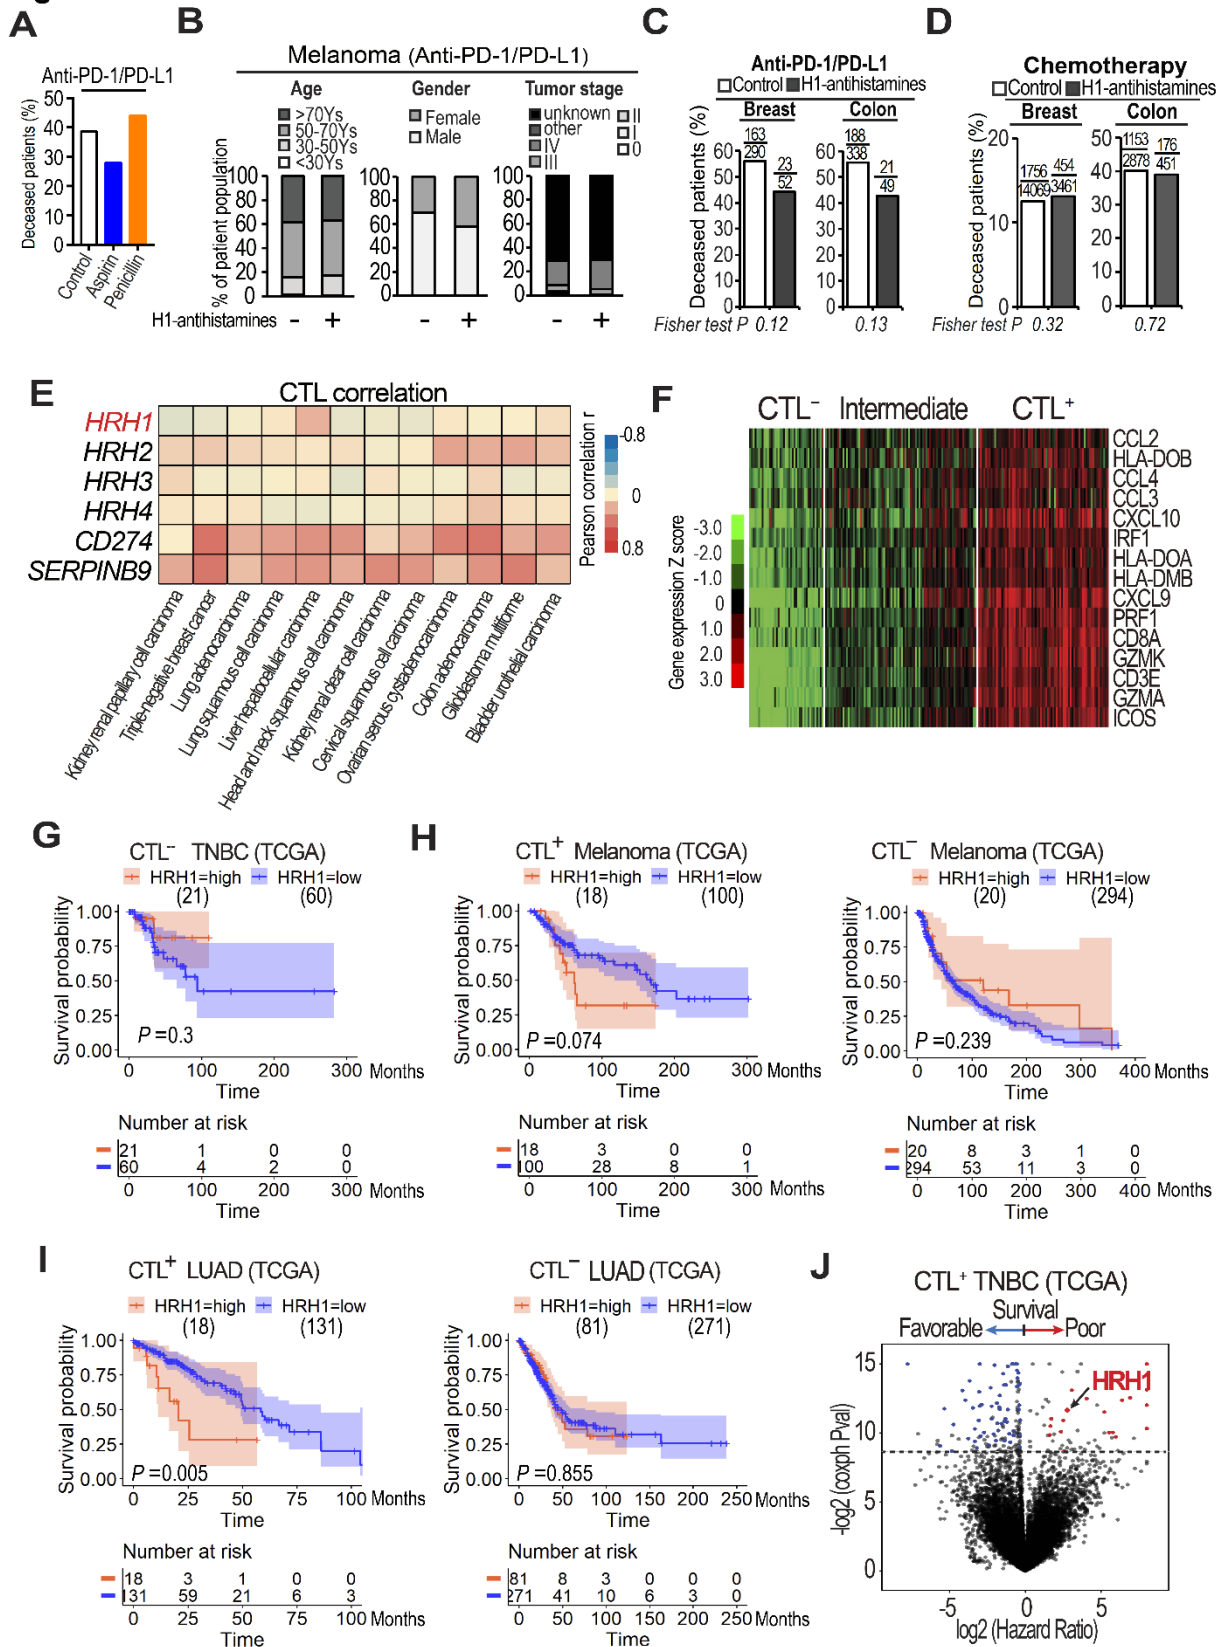

**Figure S1. Correlations between *HRH1* expression and patients' clinical outcomes in CTL<sup>+</sup> tumors across multiple cancer types, related to Figure 1.**

(A) Percentages of deceased cancer patients taking aspirin or penicillin during anti-PD-1/PD-L1 treatment *versus* those who did not. (B) The distributions of age-, sex-, and tumor stages among melanoma patients encountered at MD Anderson who took H1-antihistamines during immunotherapy compared with those who did not. (C) Percentages of deceased cancer patients taking H1-antihistamines during anti-PD-1/PD-L1 treatment *versus* those who did not (Fisher exact test). (D)

Percentages of deceased cancer patients taking H1-antihistamines during chemotherapy treatment *versus* those did not (Fisher exact test). **(E)** Pearson correlations between histamine receptors (*HRHI-4*) and CTL in the indicated cancer types analyzed by TIDE. *CD274* (*PD-L1*) and *SERPINB9* were used as controls. Color gradient represents low to high Person correlation coefficient. **(F)** Heatmap of gene expression values depicting CTL-related 15-gene signature in CTL<sup>-</sup> (n=42), intermediate (n=86), and CTL<sup>+</sup> groups (n=74). Color gradient represents low (green) to high (red) normalized Z scores of each gene across samples. **(G-I)** Kaplan-Meier survival analysis of low *HRHI* (blue) versus high *HRHI* (red) expression in CTL<sup>-</sup> TNBC **(F)**, in CTL<sup>+</sup> or CTL<sup>-</sup> melanoma **(G)**, and in CTL<sup>+</sup> or CTL<sup>-</sup> lung adenocarcinoma (LUAD) **(H)** in TCGA datasets. The numbers at risk are the stratified *HRHI* level high and low patient numbers of those who remained alive and uncensored after a certain time period. **(J)** Volcano plots of hazard ratios and  $-\log_2$  (*P* values) from the coxph analysis of CTL<sup>+</sup> triple-negative breast cancer (TNBC) in TCGA dataset. Black, all 16,975 genes. Red and blue, genes associated with poor and favorable outcomes, respectively. Horizontal dashed line marks a threshold *P* value of 0.0025.

**Table S2. Information of antihistamines uptake in cancer patients, related to Figure1.**

| Patient cancer type                      | Category       |          | Patient No. | Antihistamines uptake** |     |         |
|------------------------------------------|----------------|----------|-------------|-------------------------|-----|---------|
|                                          |                |          |             | YES                     | NO  | P-value |
| <b>Melanoma patients<br/>(2016-2017)</b> | Gender         | Male     | 598         | 58                      | 540 | 0.031   |
|                                          |                | Female   | 280         | 41                      | 239 |         |
|                                          |                | Sum      | 878         | 99                      | 779 |         |
|                                          | Age<br>(years) | <50      | 131         | 14                      | 117 | 0.896   |
|                                          |                | 50-70    | 380         | 45                      | 335 |         |
|                                          |                | >70      | 367         | 40                      | 327 |         |
|                                          |                | Sum      | 878         | 99                      | 779 |         |
|                                          | Stage*         | 0-I      | 23          | 2                       | 21  | 0.153   |
|                                          |                | II       | 15          | 0                       | 15  |         |
|                                          |                | III      | 83          | 14                      | 69  |         |
|                                          |                | IV       | 298         | 41                      | 257 |         |
|                                          |                | Others & | 502         | 51                      | 451 |         |

|                                               |                |          |     |    |     |        |
|-----------------------------------------------|----------------|----------|-----|----|-----|--------|
| <b>Breast Cancer Patients<br/>(2016-2018)</b> | Gender         | Male     |     | NA | NA  |        |
|                                               |                | Female   | 342 | 52 | 290 |        |
|                                               | Age<br>(years) | <50      | 68  | 10 | 58  | 0.992  |
|                                               |                | 50-70    | 157 | 24 | 133 |        |
|                                               |                | >70      | 117 | 18 | 99  |        |
|                                               |                | Sum      | 342 | 52 | 290 |        |
|                                               | Stage*         | 0-I      | 27  | 6  | 21  | 0.3315 |
|                                               |                | II       | 44  | 6  | 38  |        |
|                                               |                | III      | 57  | 5  | 52  |        |
|                                               |                | IV       | 90  | 16 | 74  |        |
|                                               |                | Others & | 173 | 28 | 145 |        |

(Continued) Table S2. Information of antihistamines uptake in cancer patients, related to Figure 1.

| Patient cancer type                         | Category                                     |          | Patient No. | Antihistamines uptake** |      |         |       |
|---------------------------------------------|----------------------------------------------|----------|-------------|-------------------------|------|---------|-------|
|                                             |                                              |          |             | YES                     | NO   | P-value |       |
| <b>Lung Cancer Patients<br/>(2016-2018)</b> | Gender                                       | Male     | 1137        | 135                     | 1002 | 0.562   |       |
|                                             |                                              | Female   | 800         | 102                     | 698  |         |       |
|                                             |                                              | Sum      | 1937        | 237                     | 1700 |         |       |
|                                             | Age<br>(Years)                               | <50      | 130         | 12                      | 118  | 0.400   |       |
|                                             |                                              | 50-70    | 969         | 115                     | 854  |         |       |
|                                             |                                              | >70      | 838         | 110                     | 728  |         |       |
|                                             |                                              | Sum      | 1937        | 237                     | 1700 |         |       |
|                                             | Stage*                                       | 0-I      | 79          | 11                      | 68   | 0.698   |       |
|                                             |                                              | II       | 56          | 7                       | 49   |         |       |
|                                             |                                              | III      | 113         | 12                      | 101  |         |       |
|                                             |                                              | IV       | 466         | 69                      | 397  |         |       |
|                                             |                                              | Others & | 1284        | 149                     | 1135 |         |       |
|                                             | <b>Colon Cancer Patients<br/>(2016-2018)</b> | Gender   | Male        | 205                     | 26   | 179     | 0.989 |
|                                             |                                              |          | Female      | 182                     | 23   | 159     |       |
|                                             |                                              |          | Sum         | 387                     | 49   | 338     |       |
| Age<br>(years)                              |                                              | <50      | 79          | 10                      | 69   | 0.857   |       |
|                                             |                                              | 50-70    | 194         | 23                      | 171  |         |       |
|                                             |                                              | >70      | 114         | 16                      | 98   |         |       |
|                                             |                                              | Sum      | 387         | 49                      | 338  |         |       |
| Stage*                                      |                                              | 0-I      | 4           | 1                       | 3    | 0.898   |       |
|                                             |                                              | II       | 6           | 1                       | 5    |         |       |
|                                             |                                              | III      | 17          | 2                       | 15   |         |       |
|                                             |                                              | IV       | 120         | 22                      | 98   |         |       |
|                                             |                                              | Others & | 253         | 26                      | 227  |         |       |

\*Some patients were diagnosed with different stages of cancer at different time points and may have been counted more than once.

\*\* Patients took 2<sup>nd</sup> generation antihistamines during ICB-treatment and had no allergy status reported within 10 days before the treatment.

**Figure S2**

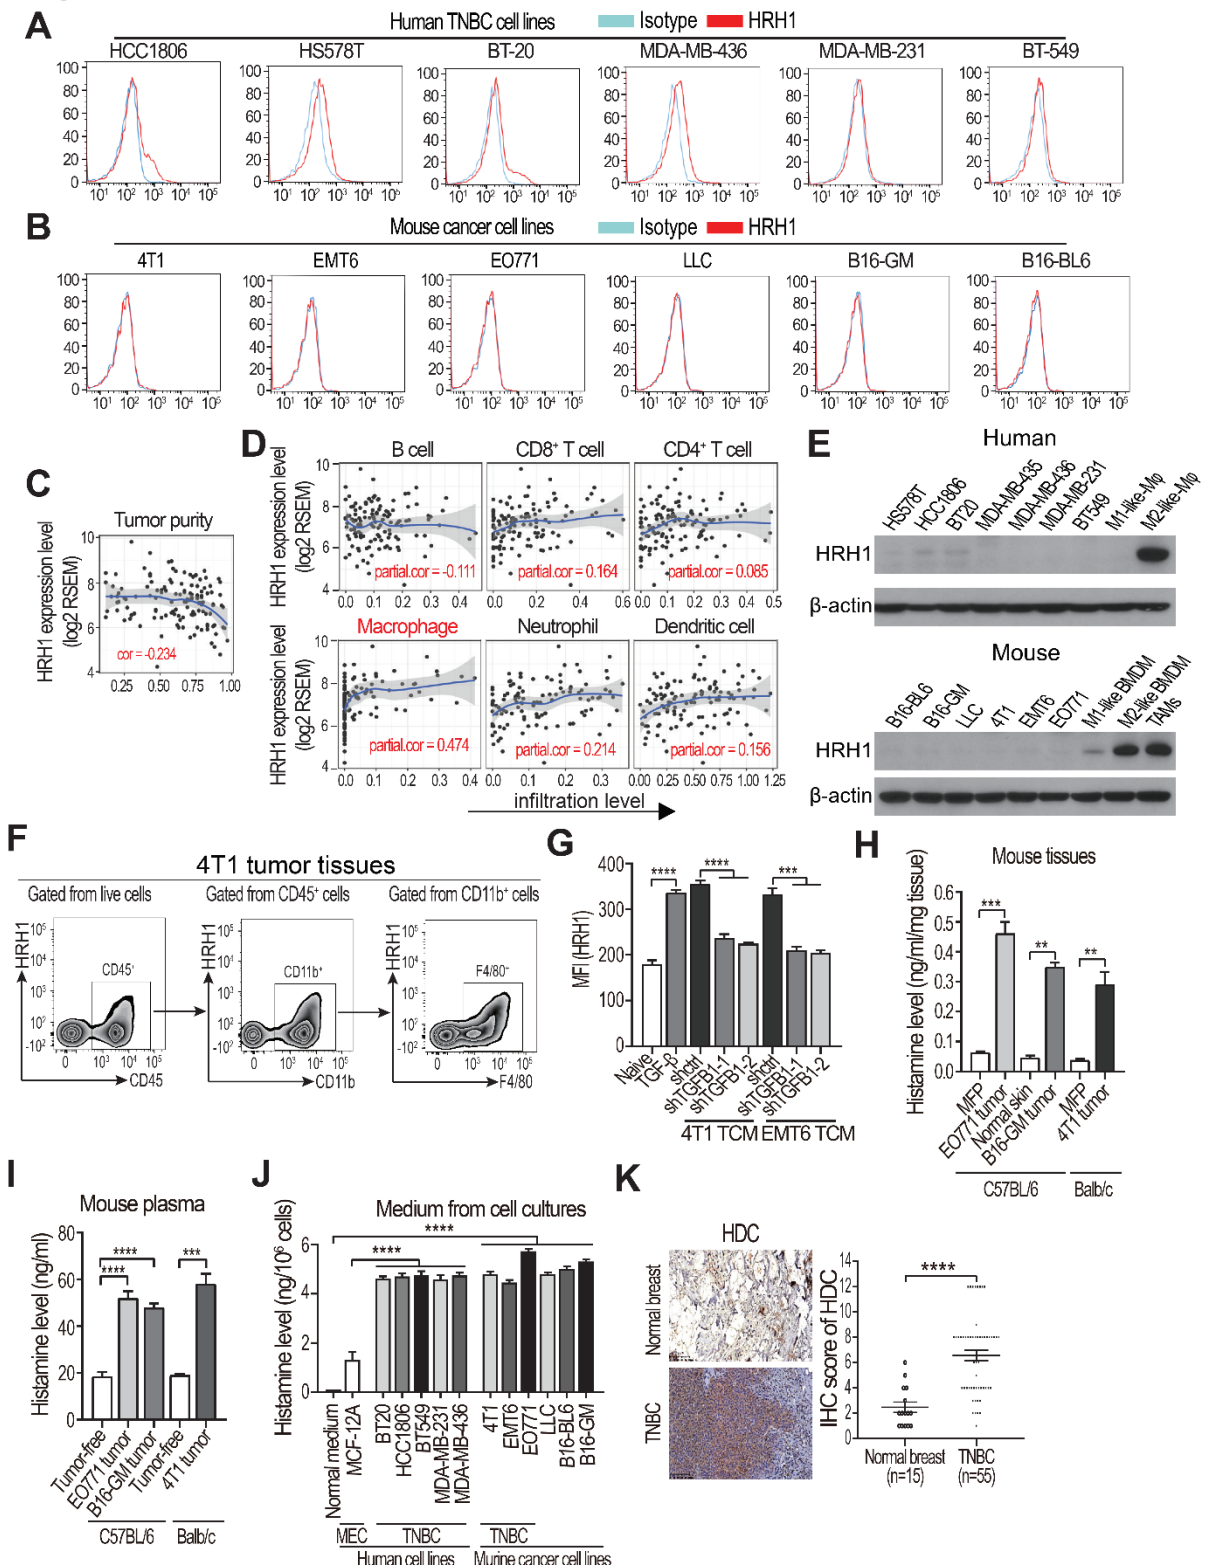

**Figure S2. HRH1 expression in cancer cell lines and macrophages, related to Figure 2.**

(A and B) Flow cytometry analysis of HRH1 expression on human (A) and mouse (B) cancer cell lines. Blue, Isotype control; Red, HRH1. (C and D) Analysis of correlations between *HRH1* expression and tumor purity (C), B-cells, CD8<sup>+</sup> T cells, CD4<sup>+</sup> T cells, macrophages, and neutrophils (D) in TCGA basal-like breast cancers using Tumor Immune Estimation Resource (TIMER). The purity-corrected partial Spearman's correlation coefficient and statistical *P* value were presented. (E) Representative western blot analysis of HRH1 expression in human and mouse cancer cell lines, and macrophages. (F) Gating strategy to identify HRH1<sup>+</sup> subsets in 4T1 tumor. Single cells isolated from digested tumor tissues were gated for viable, hemopoietic cells (CD45<sup>+</sup>), myeloids (CD45<sup>+</sup>CD11b<sup>+</sup>), and macrophages (CD11b<sup>+</sup>Gr1<sup>+</sup>F4/80<sup>+</sup>). (G) MFI of HRH1 on naïve, TGF-β (20 ng/ml)-treated, or indicated TCM-treated BMDMs. TCM

was collected from scramble ctrl (shctrl) or TGF- $\beta$ 1 knocked down (shTGFB1) 4T1 or EMT6 cells (one-way ANOVA). **(H-J)** Histamine levels in culture medium from the indicated tumor tissues **(H)**, blood plasma **(I)**, and cell lines **(J)** were detected by ELISA. MEC, mammary epithelial cells (n=3-6, t-test or one-way ANOVA). **(K)** HDC expression in normal human breast tissues and TNBC tissues was detected by IHC. Mean  $\pm$  SEM, \*\* $P < 0.01$ , \*\*\* $P < 0.001$ , \*\*\*\* $P < 0.0001$ .

**Figure S3**

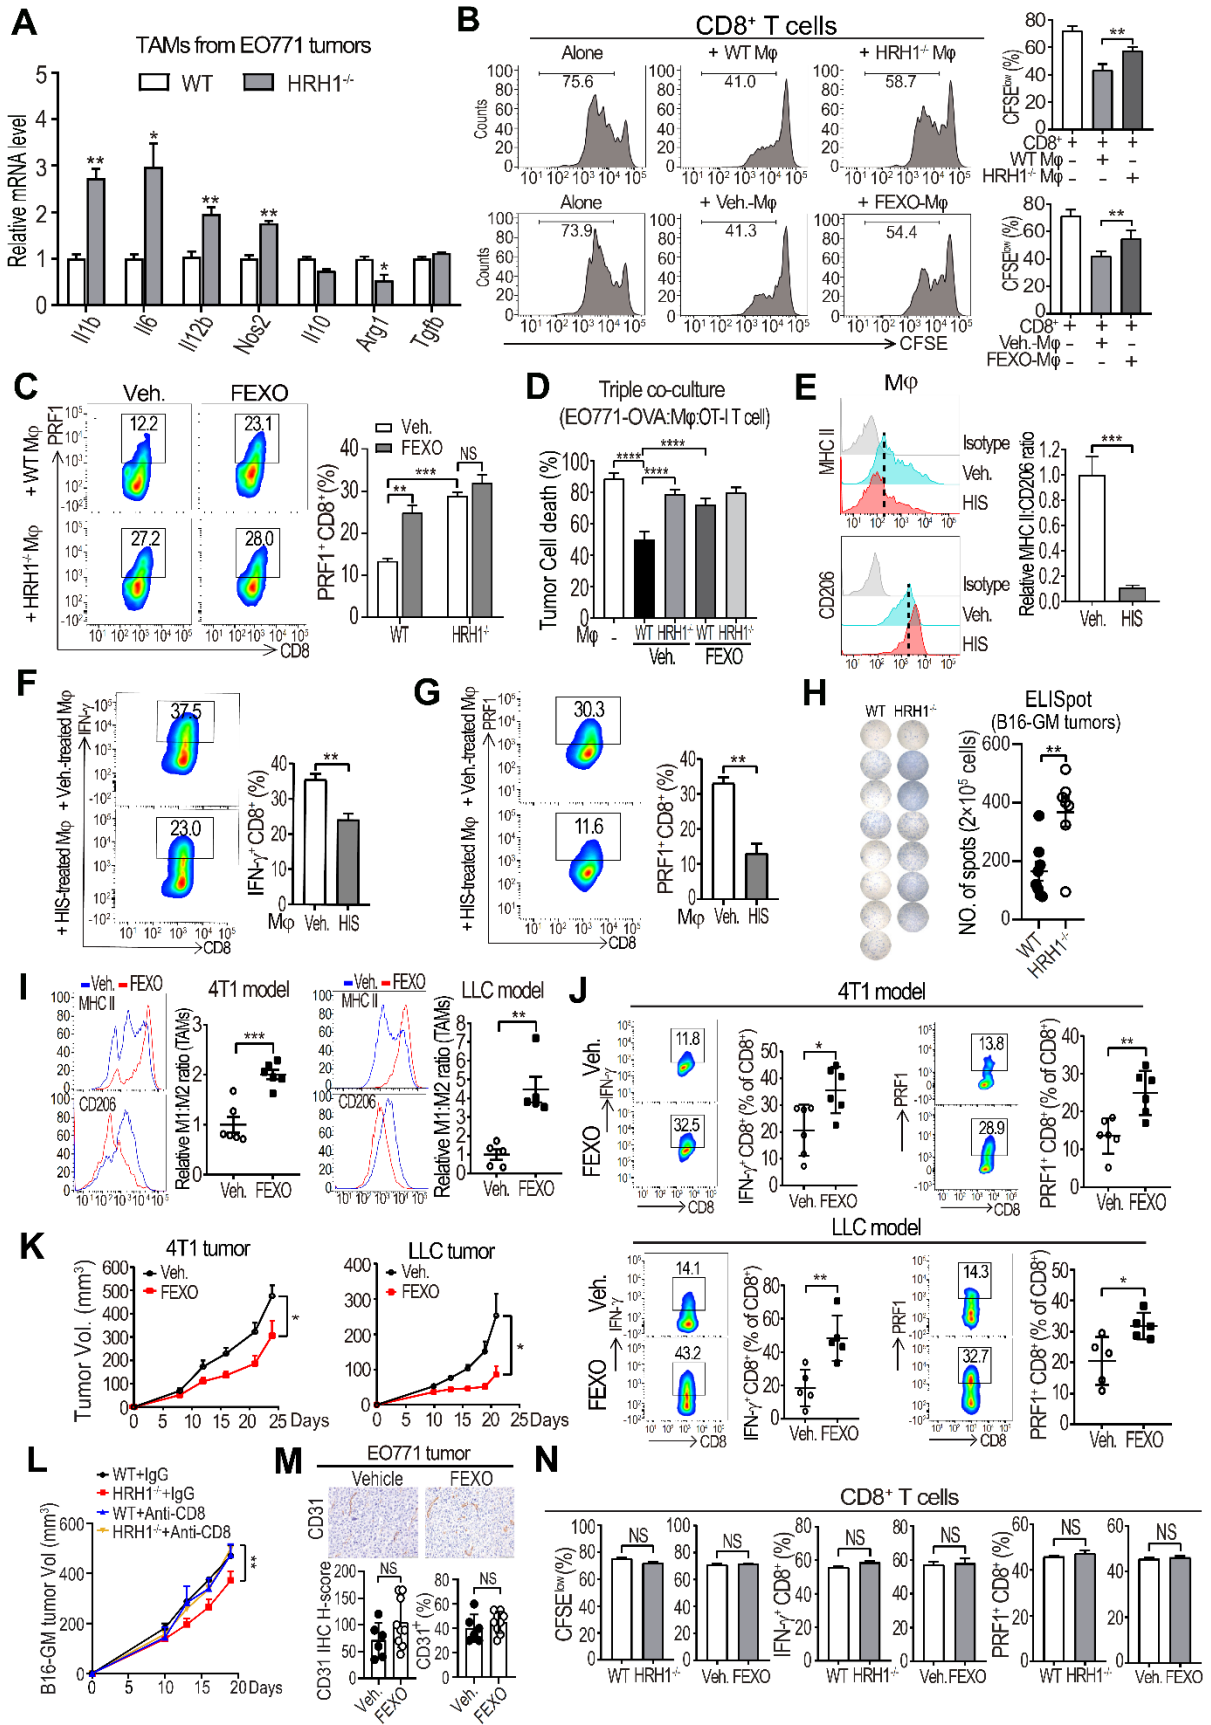

**Figure S3. HRH1 inhibition enhances T cell anti-tumor activity, related to Figure 3.**

(A) Relative mRNA levels of indicated M1 and M2 markers in TAMs of EO771 tumors growing in WT and HRH1<sup>-/-</sup> mice. (B) Representative histograms and evaluation of CD8<sup>+</sup> T cell proliferation based on carboxyfluorescein succinimidyl ester (CFSE) dilution *in vitro*. CD3/CD28 activated T cells were co-cultured with WT, HRH1<sup>-/-</sup>, vehicle- or FEXO (10 μM)-treated BMDMs (TCM-treated) for 24 hours before flow cytometry analysis. (C) Representative



flow cytometry analysis and quantification of splenic PRF1<sup>+</sup> CD8<sup>+</sup> T cells activated by CD3/CD28 *in vitro*. Activated T cells were first co-cultured with WT, HRH1<sup>-/-</sup>, vehicle- or FEXO (10 μM)-treated BMDMs (TCM-treated) for 24 hours before flow cytometry analysis. **(D)** Estimation of OT1-mediated killing of EO771-OVA cells in the presence of WT BMDM, HRH1<sup>-/-</sup> BMDM, vehicle-treated or FEXO-treated BMDM (n=6, t-test). **(E)** Representative flow cytometry analysis and quantification of M1-like macrophage marker (MHCII<sup>+</sup>) and M2-like macrophage marker (CD206<sup>+</sup>) expression in vehicle- or histamine (HIS, 10 μM)-treated peritoneal macrophages. **(F and G)** Representative flow cytometry analysis and quantification of splenic IFN-γ<sup>+</sup> CD8<sup>+</sup> T cells **(F)** and PRF1<sup>+</sup> CD8<sup>+</sup> T cells **(G)** activated by CD3/CD28 *in vitro*. Activated T cells were first co-cultured with vehicle- or HIS (10 μM)-treated peritoneal macrophages for 24 hours before flow cytometry analysis. **(H)** Quantitation of tumor-reactive T cell frequency in B16-GM tumors by IFN-γ ELISPOT assay. **(I)** Relative MHC II:CD206 MFI ratio of tumor-associated macrophages (TAMs) in 4T1 and LLC tumors from vehicle-treated versus FEXO-treated WT mice (n=5-6, t-test). **(J and K)** Percentages of IFN-γ<sup>+</sup> or PRF1<sup>+</sup> CD8<sup>+</sup> T cells **(J)**, and tumor growth **(K)** in 4T1 and LLC tumors from vehicle- or FEXO-treated mice (n=5-6, t-test for flow cytometry analysis; n= 6 mice per group, two-way ANOVA for tumor growth analysis). **(L)** B16-GM tumor growth with indicated treatment. CD8<sup>+</sup> T cells were depleted by anti-CD8 antibodies (n=6-7 mice/group, two-way ANOVA). **(M)** Evaluation of tumor blood vessel density by IHC staining of CD31 in EO771 tumors treated with vehicle or FEXO. Top: representative IHC staining slides; bottom: quantification of CD31 IHC staining using H-score (left) or CD31<sup>+</sup> cell percentage (right). **(N)** Comparison of CD8<sup>+</sup> T cell proliferation (CFSE dilution) and cytotoxic/cytolytic activities (IFN-γ<sup>+</sup> and PRF1<sup>+</sup>) between WT *versus* HRH1<sup>-/-</sup>, and vehicle- *versus* FEXO (10 μM)-treated CD8<sup>+</sup> T cells analyzed by flow cytometry (n=5, t-test). Mean ± SEM, \*P<0.05, \*\*P<0.01, \*\*\*P<0.001, \*\*\*\*P<0.0001, NS: not significant.

**Figure S4**

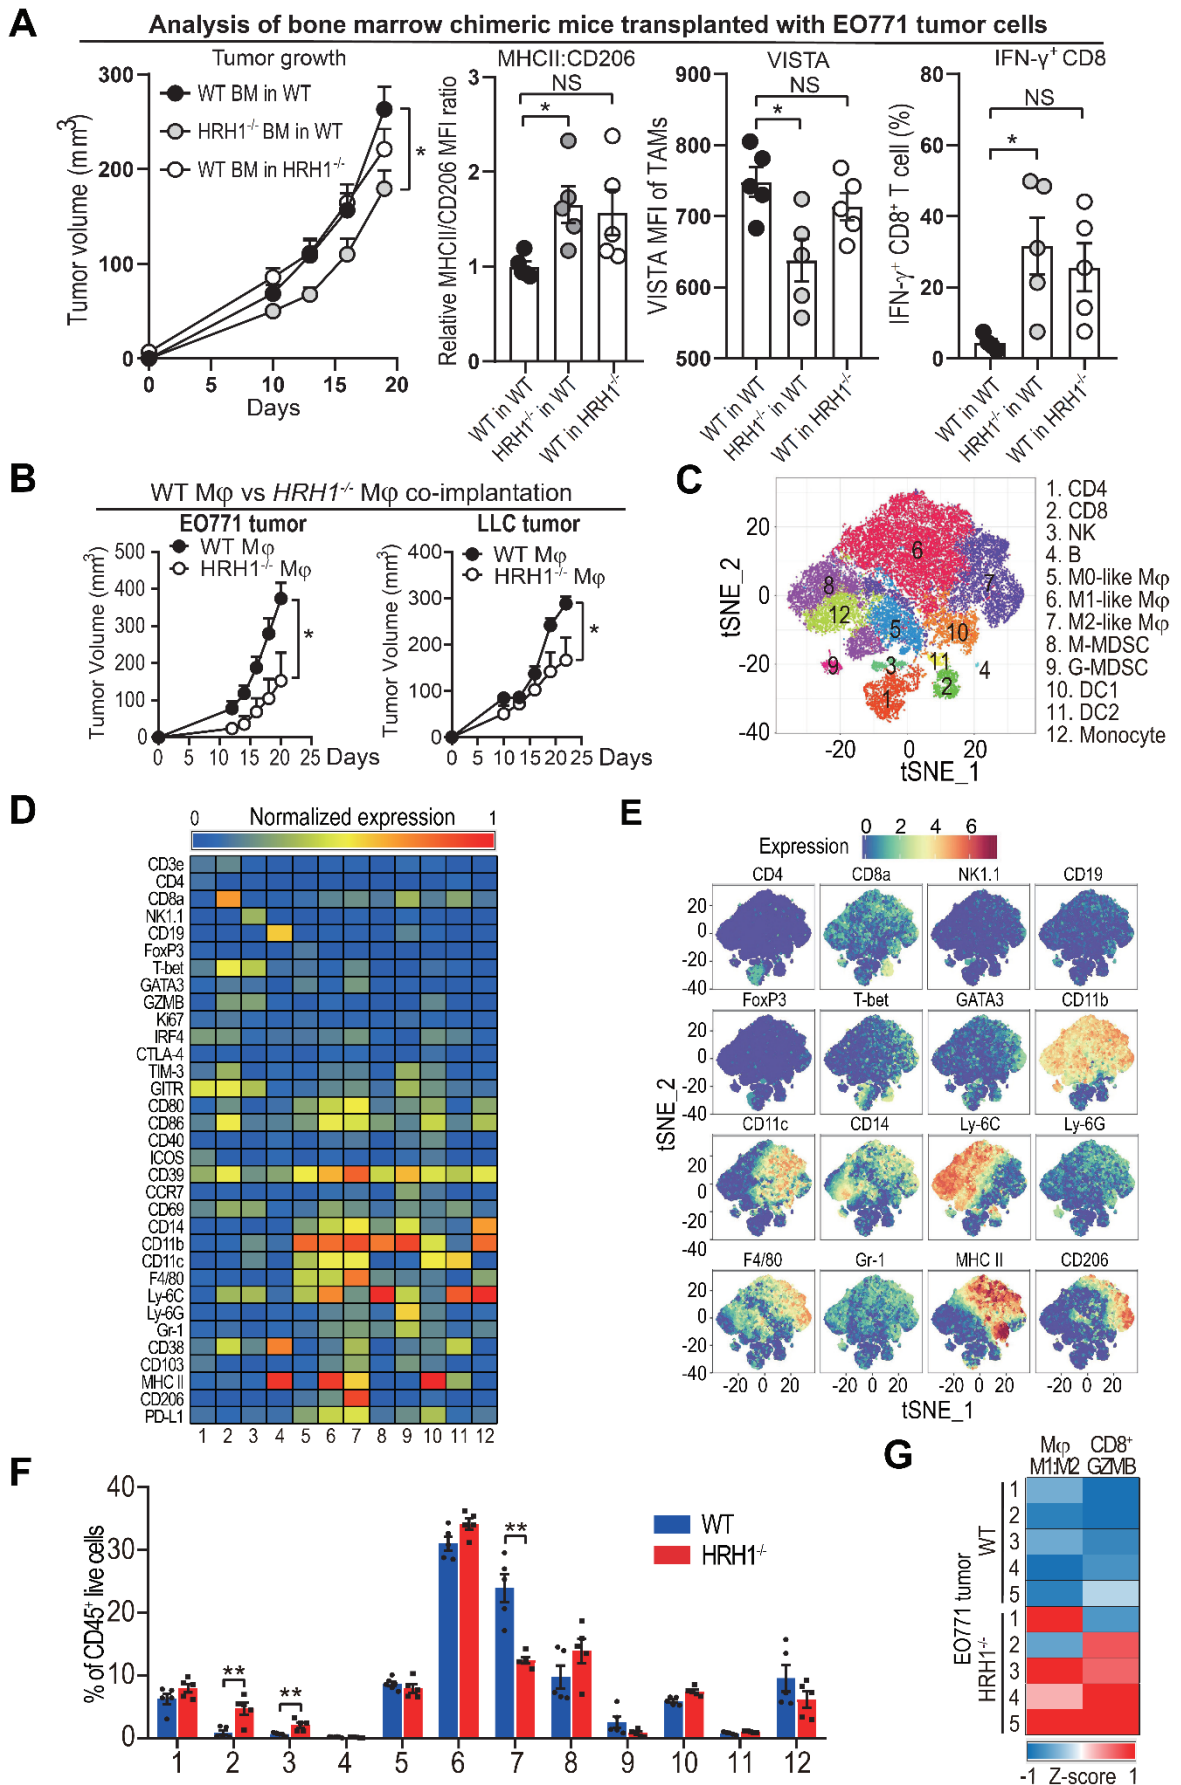

**Figure S4. Bone marrow chimeric mice experiments, macrophage co-implantation and profiling of immune microenvironment of EO771 tumors by CyTOF, related to Figure 3.**

(A) Tumor growth, MHCII:CD206 MFI ratio and VISTA expression in TAMs, and IFN $\gamma$ <sup>+</sup> CD8<sup>+</sup> T cell infiltration in EO771 tumors from indicated chimeric mice. WT in WT: WT mice reconstituted with WT bone marrow cells; HRH1<sup>-/-</sup>

<sup>-/-</sup> in WT: WT mice reconstituted with HRH1<sup>-/-</sup> bone marrows; WT in HRH1<sup>-/-</sup>: HRH1<sup>-/-</sup> mice reconstituted with WT bone marrows (n=6 mice/group, one-way ANOVA). **(B)** Growth of EO771 and LLC tumor cells co-implanted with WT or HRH1<sup>-/-</sup> BMDMs in WT recipient mice, respectively (n=6 mice/group, two-tailed t-test). **(C)** t-distributed stochastic neighbor embedding (tSNE) plot of TILs overlaid with color-coded clusters in EO771 tumors. **(D)** Heat map displaying normalized marker expression of each immune cluster. **(E)** tSNE plot of TILs overlaid with the expression of indicated markers. **(F)** Frequency of clusters of indicated immune cell subsets in EO771 tumors from WT and HRH1<sup>-/-</sup> mice (t-test). **(G)** M1:M2 ratios of macrophages (clusters 5, 6, and 7) and granzyme B (GZMB) expression in CD8 cluster (cluster 2) of each sample from WT and HRH1<sup>-/-</sup> mice (n=5/group). Mean ± SEM, \**P*<0.05, \*\**P*<0.01.

**Figure S5**

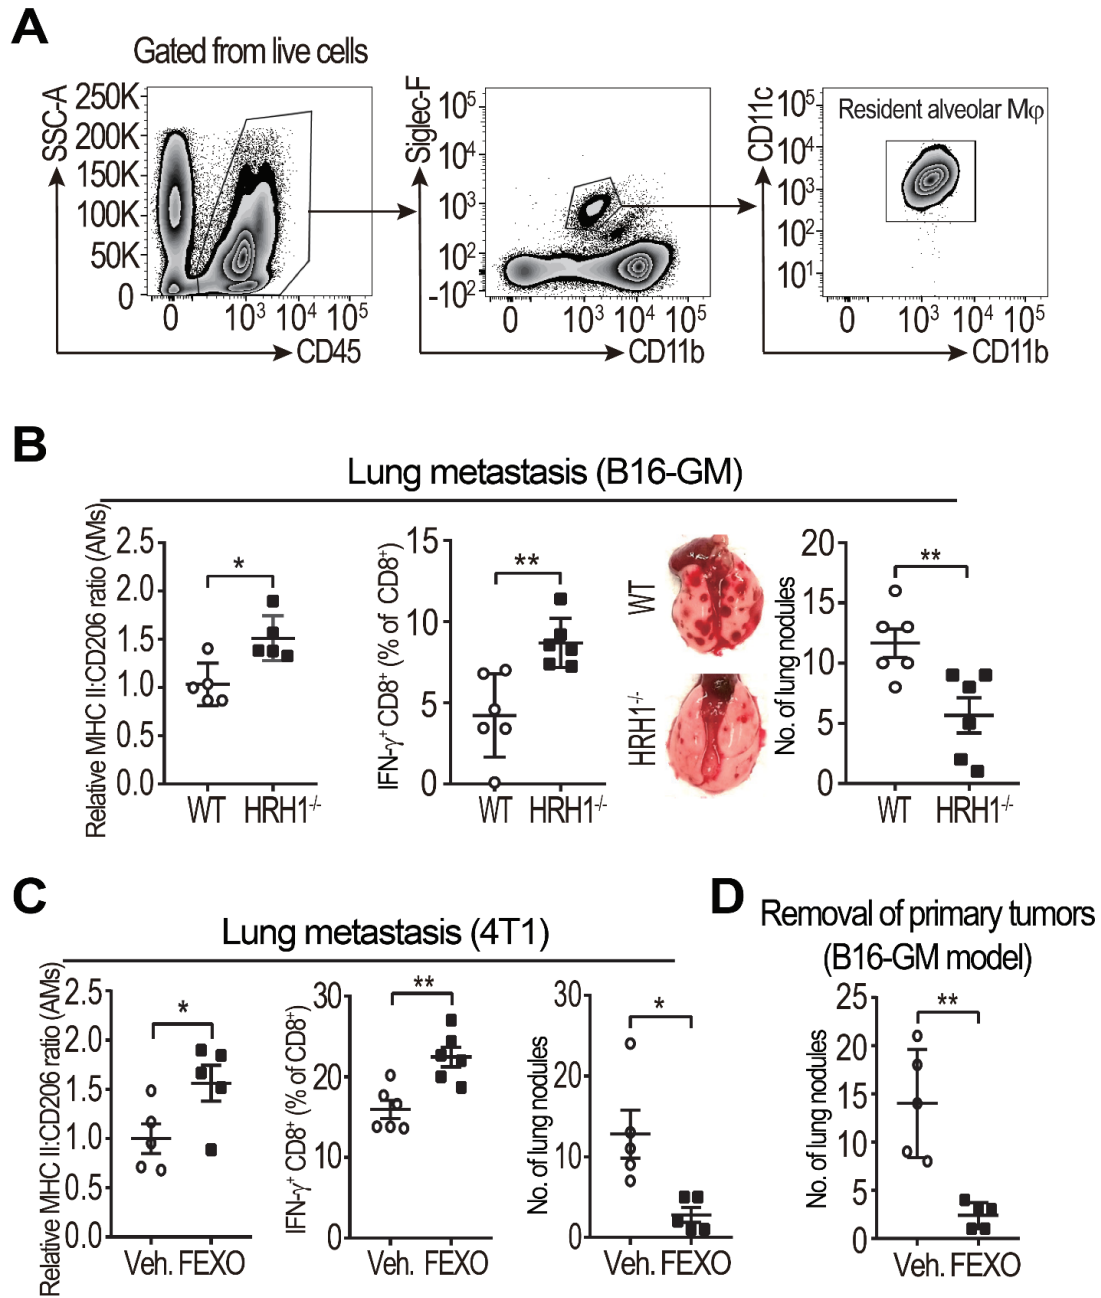

**Figure S5. HRH1 inhibition enhances T cell anti-tumor activity in lung and inhibits lung metastasis, related to Figure 3.**

(A) Gating strategy used to identify resident alveolar macrophage (AM) subset (CD11b<sup>-</sup>Siglec-F<sup>+</sup>CD11C<sup>+</sup>) in mouse lung tissues. (B and C) Relative MHC II:CD206 MFI ratio of AMs, the percentage of IFN- $\gamma$ <sup>+</sup> CD8<sup>+</sup> T cells and lung metastatic nodules in lung tissues from B16-GM tumor-bearing WT *versus* HRH1<sup>-/-</sup> mice (B) and 4T1 tumor-bearing mice treated with vehicle or FEXO (C) were analyzed by flow cytometry (n=5-6, t-test). (D) Quantification of lung metastatic nodules in vehicle- or FEXO-treated mice with surgical removal of B16-GM primary tumors at early stage (n=5, t-test). Mean  $\pm$  SEM, \* $P$ <0.05, \*\* $P$ <0.01.

**Figure S6**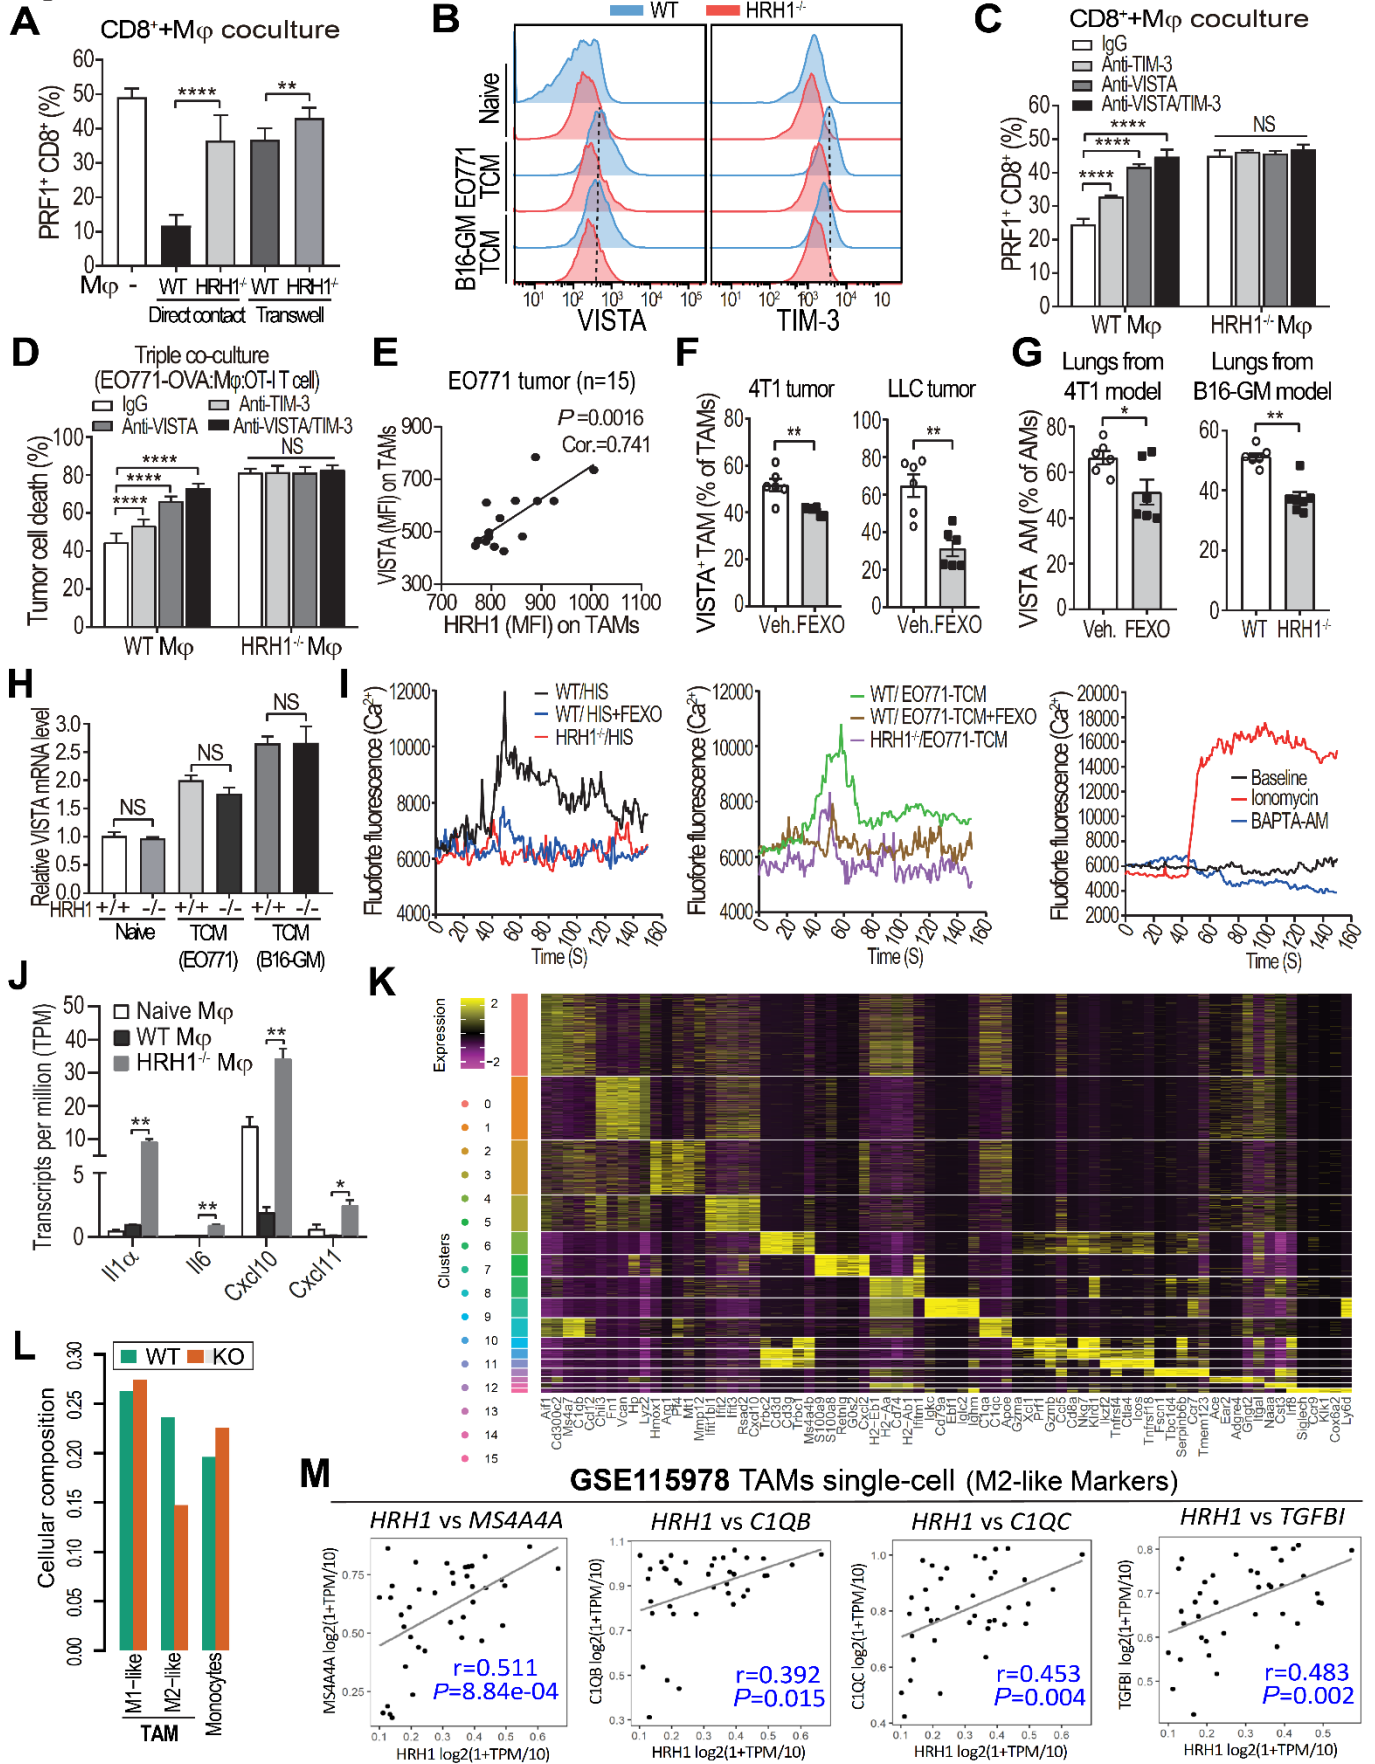**Figure S6. HRH1 activation up-regulates membrane VISTA on macrophages, related to Figures 4 and 5.**

(A) Percentages of splenic PRF1<sup>+</sup> CD8<sup>+</sup> T cells co-cultured with EO771 TCM-treated WT or HRH1<sup>-/-</sup> BMDMs in a direct-contact or separately in transwells (n=6, t-test). (B) Representative flow cytometry plots of VISTA and TIM-3 expression on naïve or TCM-treated WT or HRH1<sup>-/-</sup> BMDMs. (C) Percentages of splenic PRF1<sup>+</sup> CD8<sup>+</sup> T cells co-cultured with TCM-treated WT or HRH1<sup>-/-</sup> BMDMs pretreated with anti-TIM-3 (10  $\mu$ g/ml), anti-VISTA (10  $\mu$ g/ml)

antibodies, or combination of them (n=3-4, one-way ANOVA). **(D)** Evaluation of OT1-mediated killing of EO771-OVA cells in the presence of BMDM pretreated with IgG, anti-TIM-3 (10 µg/ml), anti-VISTA (10 µg/ml) antibodies, or combination of them (n=6, one-way ANOVA). **(E)** Pearson correlation between HRH1 and VISTA expression (MFI) on TAMs from EO771 tumors (n=15). **(F)** Flow cytometry analysis of VISTA<sup>+</sup> TAMs in 4T1 or LLC tumor tissues from mice treated with vehicle *versus* FEXO (n=6, t-test). **(G)** Flow cytometry analysis of VISTA<sup>+</sup> AMs in lung tissues from mice treated with vehicle *versus* FEXO (4T1 tumors), or WT *versus* HRH1<sup>-/-</sup> mice (B16-GM tumors) (n=6, t-test). **(H)** Relative mRNA level of VISTA in naïve or TCM-treated WT and HRH1<sup>-/-</sup> BMDMs (n=6, t-test). **(I)** Mobilization of intracellular calcium determined by Fluo-Forte calcium assay. The intracellular calcium concentration was indicated by Fluo-Forte fluorescence. HIS (histamine), 1 µM; FEXO, 10 µM; ionomycin-Ca<sup>2+</sup>, 1 µg/ml; BAPTA-AM, 10 µM. **(J)** The expression of indicated genes in naïve, TCM-treated WT and HRH1<sup>-/-</sup> BMDM. **(K)** Gene expression heatmap showing the top 5 highly expressed marker genes between clusters. Gene expression scale is beneath the heatmap, together with the color annotations for cluster identity. **(L)** Bar chart showing different cellular composition of monocytes/macrophage subsets between HRH1-knockout (KO) and WT mice groups. **(M)** Scatter-plot results from the Pearson's correlation analysis of *HRH1* and indicated M2-like macrophage markers at single-cell level in TAMs of human melanomas (GSE115978). Mean ± SEM, all *in vitro* experiments were performed at least three times. \**P*<0.05, \*\**P*<0.01, \*\*\*\**P*<0.0001, NS: not significant.

**Figure S7**

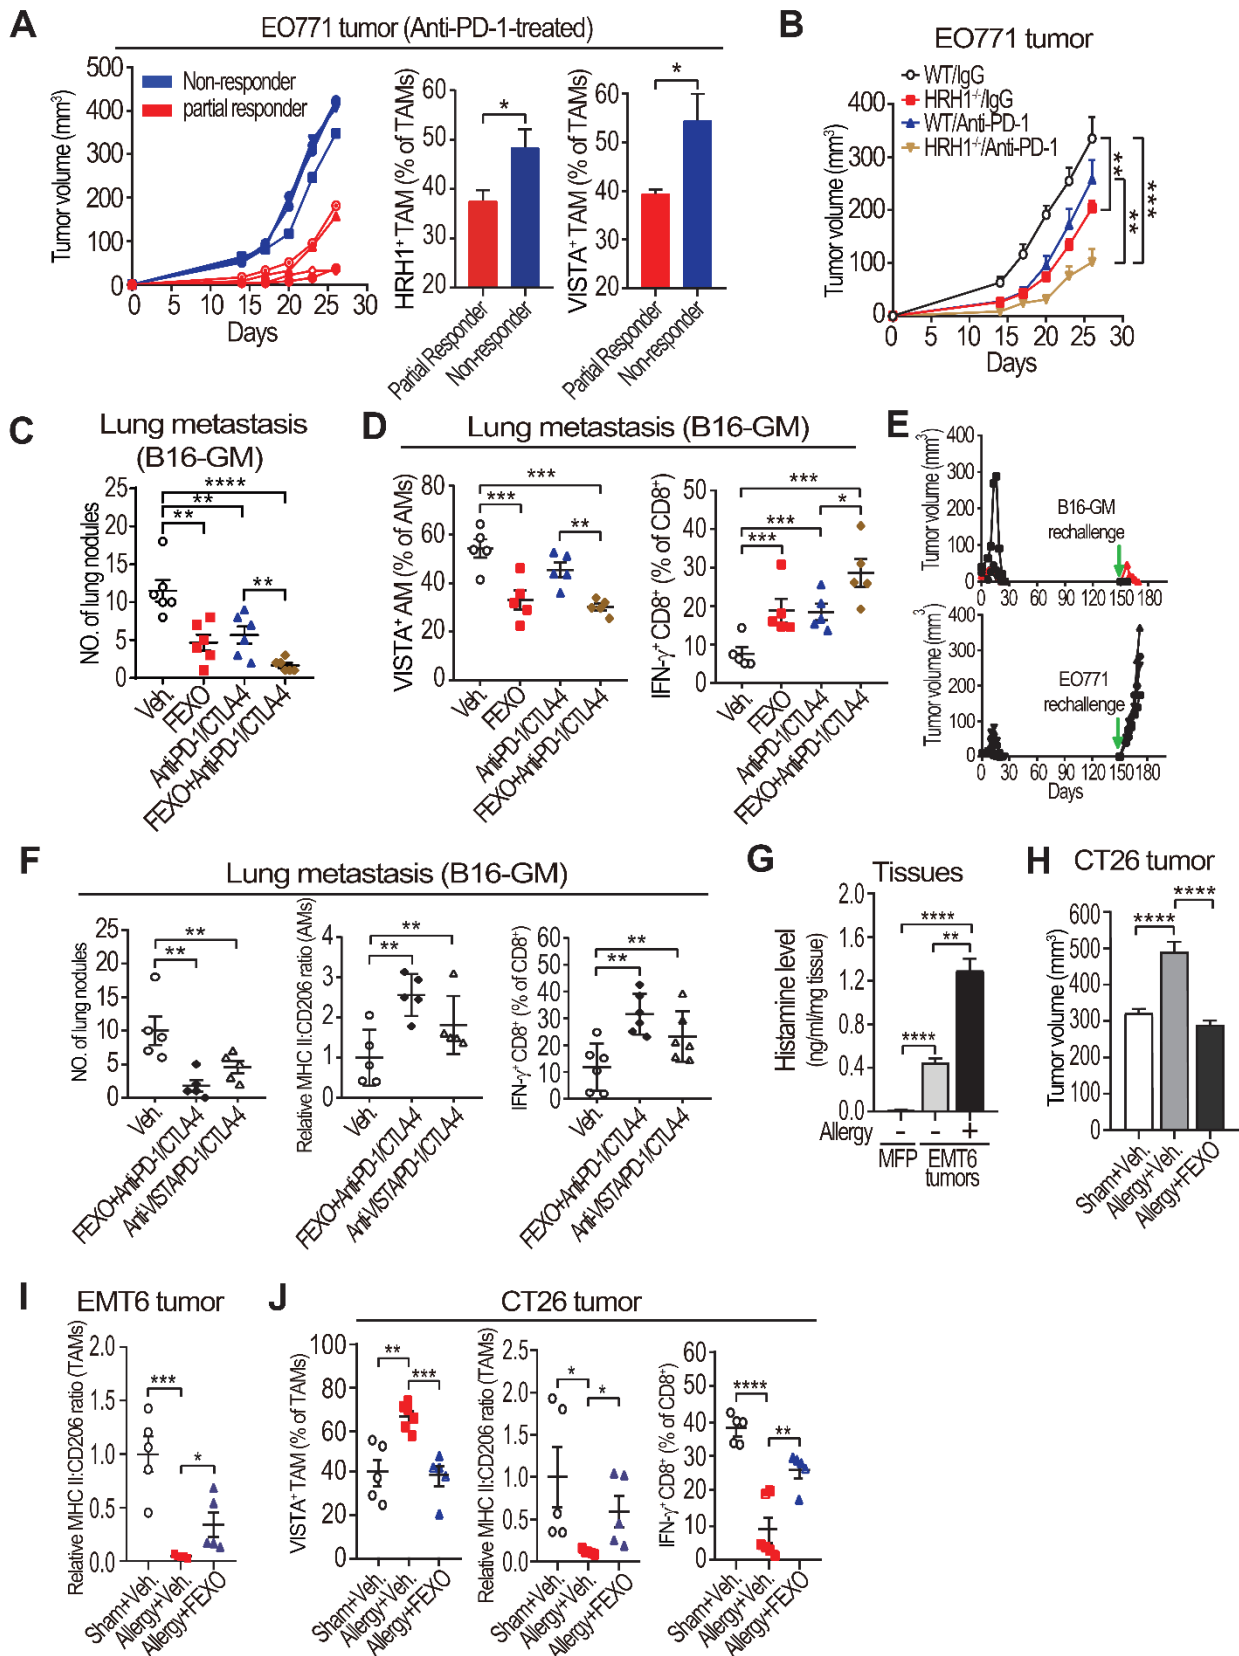

**Figure S7. H1-antihistamines synergize with ICB therapy and rescue cancer cell- and allergy-induced immune suppression, related to Figures 6 and 7.**

(A) EO771 tumor growth and HRH1<sup>+</sup>/VISTA<sup>+</sup> TAMs from partial responders *versus* non-responders (n=4, t-test). (B) EO771 tumor growth in WT and HRH1<sup>-/-</sup> mice treated with IgG or anti-PD-1 antibody (n=7-13 mice/group, two-way ANOVA). (C) Lung metastasis of B16-GM tumor-bearing WT mice treated with ICB alone, FEXO alone, or ICB+FEXO (n=6, one-way ANOVA). (D) Flow cytometry analysis of VISTA<sup>+</sup> TAMs and IFN- $\gamma$ <sup>+</sup> CD8<sup>+</sup> T cells in lung tissues from B16-GM-bearing mice treated with indicated regimens (n=5, one-way ANOVA). (E) Tumor growth in mice

that had complete B16-GM tumor remission in FEXO+ICB group followed by B16-GM or EO771 cell re-challenging (4 mice/each group). **(F)** Quantification of metastatic lung nodules, relative MHC II:CD206 MFI ratios of AMs, and IFN- $\gamma^+$  CD8 $^+$  T cells in lung tissues from mice-bearing B16-GM tumor treated with indicated regimens (n=5-6, one-way ANOVA). **(G)** Histamine levels detected by ELISA in normal mammary tissue and EMT6 tumors with or without induced allergic reaction (n=3, one-way ANOVA). **(H)** CT26 tumor growth in allergic or sham control mice, followed by vehicle or FEXO treatment (n=7-8 mice/group, two-way ANOVA for tumor volume comparison). **(I)** Analysis of relative MHC II:CD206 MFI ratio (TAMs) in EMT6 tumors from sham control mice, allergic mice, and allergic mice treated with FEXO (n=5, t-test). **(J)** Analysis of VISTA $^+$  TAMs, relative MHC II:CD206 MFI ratio of TAMs and IFN- $\gamma^+$  CD8 $^+$  T cells in CT26 tumors from sham control mice or allergic mice treated with vehicle or FEXO (n=5-6, t-test). Mean  $\pm$  SEM, \* $P$ <0.05, \*\* $P$ <0.01, \*\*\* $P$ <0.001, \*\*\*\* $P$ <0.0001.



**Table S3. Allergy information of cancer patients, related to Figure 7.**

| Patient Cancer type       | Allergy status reported | No allergy status reported | Sum  |
|---------------------------|-------------------------|----------------------------|------|
| Melanoma (2016-2017)      | 150                     | 728                        | 878  |
| Breast Cancer (2016-2018) | 88                      | 254                        | 342  |
| Lung Cancer (2016-2018)   | 318                     | 1619                       | 1937 |
| Colon Cancer (2016-2018)  | 100                     | 287                        | 387  |

**Table S4. Responses of anti-PD-1-treated lung cancer patients (n=48) and distributions of their age, sex, and tumor stage with indicated plasma histamine levels, related to Figure 7.**

|                 | Treatment response |    |    |    | Age       |             |           | Gender   |            | TNM stage |    |  |
|-----------------|--------------------|----|----|----|-----------|-------------|-----------|----------|------------|-----------|----|--|
|                 | CR                 | PR | SD | PD | >70<br>Ys | 50-70<br>Ys | <50<br>Ys | Mal<br>e | Femal<br>e | III       | IV |  |
| Histamine       | <b>Low</b>         |    |    |    |           |             |           |          |            |           |    |  |
|                 | (<0.3 ng/ml)       |    |    |    |           |             |           |          |            |           |    |  |
|                 | 1                  | 9  | 6  | 2  | 5         | 10          | 3         | 16       | 2          | 4         | 14 |  |
| <b>Medium</b>   |                    |    |    |    |           |             |           |          |            |           |    |  |
| (0.3-0.6 ng/ml) |                    |    |    |    |           |             |           |          |            |           |    |  |
| 0               | 7                  | 6  | 6  | 3  | 14        | 2           | 15        | 4        | 6          | 13        |    |  |
| <b>High</b>     |                    |    |    |    |           |             |           |          |            |           |    |  |
| (≥ 0.6 ng/ml)   |                    |    |    |    |           |             |           |          |            |           |    |  |
| 0               | 2                  | 3  | 6  | 2  | 7         | 2           | 9         | 2        | 3          | 8         |    |  |

**Table S5. Responses of anti-PD-1-treated colon cancer patients (n=12) and distributions of their age, sex, and tumor stage with indicated plasma histamine levels, related to Figure 7.**

|                  | Treatment response               |    |    | Age    |          |        | Gender |        | TNM stage |    |   |
|------------------|----------------------------------|----|----|--------|----------|--------|--------|--------|-----------|----|---|
|                  | PR                               | SD | PD | >70 Ys | 50-70 Ys | <50 Ys | Male   | Female | III       | IV |   |
| <b>Histamine</b> | <b>Low</b><br>(<0.3 ng/ml)       | 0  | 0  | 0      | 0        | 0      | 0      | 0      | 0         | 0  |   |
|                  | <b>Medium</b><br>(0.3-0.6 ng/ml) | 2  | 1  | 1      | 2        | 0      | 2      | 4      | 0         | 1  | 3 |
|                  | <b>High</b><br>(≥ 0.6 ng/ml)     | 2  | 2  | 4      | 3        | 3      | 2      | 6      | 2         | 1  | 7 |

**Table S6. Responses of anti-PD-1-treated breast cancer patients (n=10) and distributions of their age, sex, and tumor stage with indicated plasma histamine levels, related to Figure 7.**

|                  | Treatment response               |    |    | Age    |          |        | Gender |        | TNM stage |    |   |
|------------------|----------------------------------|----|----|--------|----------|--------|--------|--------|-----------|----|---|
|                  | PR                               | SD | PD | >70 Ys | 50-70 Ys | <50 Ys | Male   | Female | III       | IV |   |
| <b>Histamine</b> | <b>Low</b><br>(<0.3 ng/ml)       | 0  | 0  | 0      | 0        | 0      | 0      | 0      | 0         | 0  |   |
|                  | <b>Medium</b><br>(0.3-0.6 ng/ml) | 1  | 2  | 1      | 0        | 3      | 1      | 0      | 4         | 0  | 4 |
|                  | <b>High</b><br>(≥ 0.6 ng/ml)     | 0  | 2  | 4      | 1        | 4      | 1      | 0      | 6         | 1  | 5 |
